# Supplementary material for: High-Aspect-Ratio Silicon Metasurfaces: Design, Fabrication, and Characterization
Source: MDPI journal article supplement (doi:10.3390/app13179607), 2023-08-24
Supplement: s1 [file s1]

## Supporting Information

# High-Aspect-Ratio Silicon Metasurfaces: Design, Fabrication, and Characterization

Yao Yao <sup>1</sup>, Zhuo Wang <sup>1</sup>, Zhiyan Zhu <sup>2</sup>, Yu He <sup>1</sup>, Shulin Sun <sup>2</sup>, Lei Zhou <sup>1</sup> and Qiong He <sup>1,\*</sup>

<sup>1</sup> State Key Laboratory of Surface Physics, Key Laboratory of Micro and Nano Photonic Structures (Ministry of Education) and Department of Physics, Fudan University, Shanghai 200433, China; 19110190005@fudan.edu.cn (Y.Y.); zhuowang15@fudan.edu.cn (Z.W.); 21110190006@m.fudan.edu.cn (Y.H.); phzhou@fudan.edu.cn (L.Z.)

<sup>2</sup> Shanghai Engineering Research Centre of Ultra Precision Optical Manufacturing, Department of Optical Science and Engineering, School of Information Science and Technology, Fudan University, Shanghai 200433, China; 21110720021@m.fudan.edu.cn (Z.Z.); sls@fudan.edu.cn (S.S.)

\* Correspondence: qionghe@fudan.edu.cn; Tel.: +86-21-31242282

A: Influence of parameters process on the fabrication quality of silicon metasurfaces.

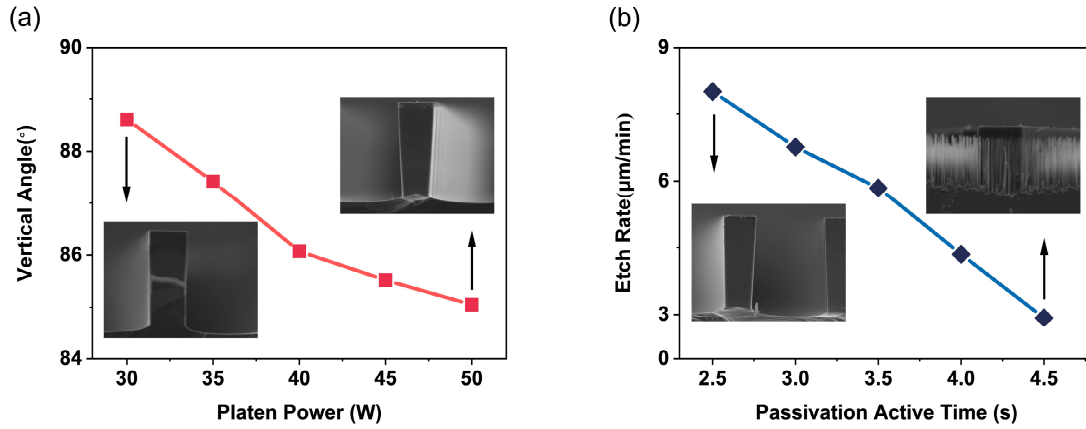

**Figure S1.** (a) Profiles of sidewall characterized by the vertical angle as function of platen power; (b) etch rate as a function of passivation active time

## B: Optimized broadband meta half-wave plate

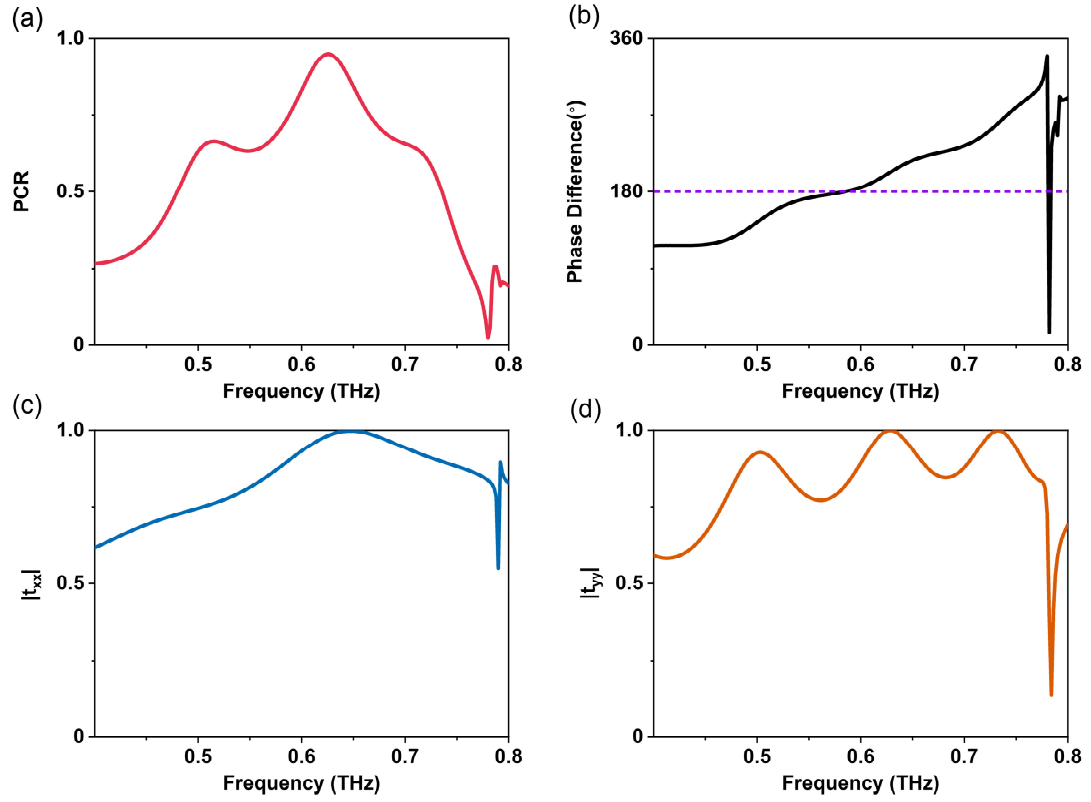

**Figure S2.** The optimized broadband meta half-wave plate: polarization conversion ratio (a), phase difference (b) between x-and y-polarized transmissive THz wave, transmission amplitudes for x-polarized (c) and y-polarized (d) transmissive, with the following geometrical parameters:  $H = 400$ ,  $P = 130$ ,  $h = 38$ ,  $d_1 = d_2 = 120$ ,  $d_3 = 62$ ,  $w_1 = 33$ ,  $w_2 = 50$ , all in units of  $\mu\text{m}$
