# Supplementary material for: High-Aspect-Ratio Silicon Metasurfaces: Design, Fabrication, and Characterization
Source: MDPI journal article supplement (doi:10.3390/app13179607), 2023-08-24
Supplement: s1 [file s1]

Archive with 1 entries (1 files):
- applsci-2534622-supplementary.pdf
